# Supplementary material
Source: MDPI journal article supplement (https://www.mdpi.com/2076-3417/11/9/4150)
Supplement: s1 [file s1 › applsci-1183883-supplementary.pdf]

# Supplement 1 - Search strategy for MEDLINE database

((("Joints"[Mesh] OR articular[All Fields] OR joint\*[All Fields] OR lymphatic[All Fields] OR "Lymphatic System"[Mesh] OR "Abdomen"[Mesh] OR abdominal[All Fields] OR abdomen[All Fields] OR "Thorax"[Mesh] OR thorax[All Fields] OR thoracic[All Fields] OR "Foot"[Mesh] OR foot[All Fields] OR pedal[All Fields] OR "Muscles"[Mesh] OR muscle\*[All Fields] OR muscular\*[All Fields] OR myofascial\* OR technique\* OR osteopathic\* OR "manipulation, osteopathic"[MeSH Terms]) AND (pump\*[All Fields] OR pompag\*[All Fields])) OR pompag\*[All Fields] NOT (proton OR insuline OR efflux OR on-pump OR off-pump) AND ("randomized controlled trials as topic"[MeSH Terms] OR ("randomized controlled trial"[Publication Type] OR "randomized controlled trials as topic"[MeSH Terms] OR "randomized controlled trial"[All Fields] OR "randomised controlled trial"[All Fields]) OR ("controlled clinical trial"[Publication Type] OR "controlled clinical trials as topic"[MeSH Terms] OR "controlled clinical trial"[All Fields])))

# Supplement 2 – Details on the studies excluded from this review, with reasons

| Author                      | Title                                                                                                                                                    |
|-----------------------------|----------------------------------------------------------------------------------------------------------------------------------------------------------|
| <b>WRONG POPULATION (6)</b> |                                                                                                                                                          |
| Creasy C. (2013)            | Thoracic and Abdominal Lymphatic Pump Techniques Inhibit the Growth of <i>S. pneumoniae</i> Bacteria in the Lungs of Rats                                |
| Elnaggar, R. K. (2019)      | Prospective Effects of Manual Diaphragmatic Release and Thoracic Lymphatic Pumping in Childhood Asthma                                                   |
| Hodge, L.M. (2010)          | Lymphatic pump manipulation mobilizes inflammatory mediators into lymphatic circulation                                                                  |
| Marty Knott, E. (2005)      | Increased Lymphatic Flow in the Thoracic Duct During Manipulative Intervention                                                                           |
| Schander, A. (2012)         | Lymphatic pump manipulation mobilizes inflammatory mediators into lymphatic circulation                                                                  |
| Schander, A. (2013)         | Lymphatic Pump Treatment Repeatedly Enhances the Lymphatic and Immune Systems                                                                            |
| <b>INTERVENTION (42)</b>    |                                                                                                                                                          |
| Ajimsha M.S. (2013)         | Effectiveness of myofascial release: Systematic review of randomized controlled trials                                                                   |
| Arguisuelas M. (2017)       | Effects of Myofascial Release in Nonspecific Chronic Low Back Pain                                                                                       |
| Basaran, S. (2009)          | Breast Cancer Related Lymphedema and Conservative Therapies                                                                                              |
| Bergan, J. J (1998)         | A comparison of compression pumps in the treatment of lymphedema                                                                                         |
| Bertelli, D. (2013)         | Postural drainage and manual lymphatic drainage for lower limb edema in women with morbid obesity after bariatric surgery: A randomized controlled trial |
| Bjørnæs K. (2017)           | The Effect of Osteopathic Manipulation Therapy (OMT) in Patients with Gastroesophageal Reflux Disease (GERD)                                             |
| Brown, J. C. (2014)         | Prescription and adherence to lymphedema self-care modalities among women with breast cancer-related lymphedema                                          |

|                           |                                                                                                                                                                                                         |
|---------------------------|---------------------------------------------------------------------------------------------------------------------------------------------------------------------------------------------------------|
| Budgell B. (2006)         | The effects of thoracic manipulation on heart rate variability: a controlled crossover trial                                                                                                            |
| Castro-Sanchez A. (2011)  | Benefits of Massage-Myofascial Release Therapy on Pain, Anxiety, Quality of Sleep, Expression, and Quality of Life in Patients with Fibromyalgia                                                        |
| Chen, Q. (2016)           | Clinical efficacy of multi-pattern detumescence after total knee arthroplasty treated with acupoint massage and mild moxibustion                                                                        |
| Crisostomo, R.S.D. (2015) | Influence of Manual Lymphatic Drainage on Health-Related Quality of Life and Symptoms of Chronic Venous Insufficiency: A Randomized Controlled Trial                                                    |
| Crisostomo, R.S.S. (2017) | Venous flow during manual lymphatic drainage applied to different regions of the lower extremity in people with and without chronic venous insufficiency: a cross-sectional study                       |
| De Carvalho, A. R. (2008) | Influence of manual techniques in the respiratory muscle strength, functional capacity and mobility of the costal grid of senior                                                                        |
| De Macedo N. (2014)       | The effect of manual therapy on lumbar disc protrusion                                                                                                                                                  |
| De Sousa (2014)           | The myofascial release and the treatment of tension headache induced by trigger points                                                                                                                  |
| Devoogdt, N. (2011)       | Is manual lymph drainage applied after axillary lymph node dissection for breast cancer effective to prevent arm lymphoedema?                                                                           |
| Devoogdt, N. (2018)       | Manual lymph drainage may not have a preventive effect on the development of breast cancer-related lymphoedema in the long term: a randomised trial                                                     |
| Dönmez, A.A. (2017)       | The effectiveness of a clinical and home-based physical activity program and simple lymphatic drainage in the prevention of breast cancer-related lymphedema: A prospective randomized controlled study |
| Ergin, G. (2019)          | Effectiveness of kinesio taping on anastomotic regions in patients with breast cancer-related lymphedema: A randomized controlled pilot study                                                           |
| Ezzo, J. (2015)           | Manual lymphatic drainage for lymphedema following breast cancer treatment                                                                                                                              |
| Giles P. (2011)           | Suboccipital Decompression Enhances Heart Rate Variability Indices of Cardiac Control in Healthy Subjects                                                                                               |
| Gurdal, S.O. (2012)       | Comparison of intermittent pneumatic compression with manual lymphatic drainage for treatment of breast cancer-related lymphedema                                                                       |
| Ha, K.J. (2017)           | Synergistic effects of proprioceptive neuromuscular facilitation and manual lymphatic drainage in patients with mastectomy-related lymphedema                                                           |
| Heberle, A.B. (2014)      | Assessment of techniques of massage and pumping in the treatment of breast engorgement by thermography                                                                                                  |
| Henley C. (2008)          | Osteopathic manipulative treatment and its relationship to autonomic nervous system activity as demonstrated by heart rate variability: a repeated measures study                                       |
| Hruby R.J. (2006)         | Avian influenza: an osteopathic component to treatment                                                                                                                                                  |

|                                |                                                                                                                                                                      |
|--------------------------------|----------------------------------------------------------------------------------------------------------------------------------------------------------------------|
| Jonas, P. (2016)               | Efficacy of the Stendo Pulsating suit in patients with leg lymphedema: a pilot randomized study                                                                      |
| Khuman P. (2013)               | Myofascial Release Technique in Chronic Lateral Epicondylitis: A Randomized Controlled Study                                                                         |
| Lamba D. (2018)                | Effect of myofascial release and stretching exercise on plantar fasciitis a randomize, comparative study                                                             |
| Marchuk C. (2010)              | Repercusión de la maniobra lift de vejiga sobre el punto gatillo miofascial del músculo tibial anterior y de la apófisis espinosa de lumbar 5                        |
| Martínez-Hurtado I. (2019)     | Effects of diaphragmatic myofascial release on gastroesophageal reflux disease: a preliminary randomized controlled trial                                            |
| McNeely, M.L. (2004)           | The addition of manual lymph drainage to compression therapy for breast cancer related lymphedema: A randomized controlled trial                                     |
| Molski, P. (2013)              | Manual lymphatic drainage improves the quality of life in patients with chronic venous disease: A randomized controlled trial                                        |
| Redjieski J. (1998)            | Effect of osteopathic manipulative treatment on length of stay for pancreatitis: a randomized pilot study                                                            |
| Smykla, A. (2013)              | Effect of Kinesiology Taping on breast cancer-related lymphedema: A randomized single-blind controlled pilot study                                                   |
| Szuba, A. (2016)               | Upper Extremity Lymphedema After Axillary Lymph Node Dissection: Prospective Lymphoscintigraphic Evaluation                                                          |
| Tastaban, E. (2020)            | Role of intermittent pneumatic compression in the treatment of breast cancer-related lymphoedema: a randomized controlled trial                                      |
| Theys, S. (2014)               | Drainage pneumatique (i-press®) versus drainage manuel ide lymphoedeme secondaire du bras même compression, même benefice?                                           |
| Theys, S. (2015)               | I-Press® pneumatic drainage versus manual drainage in upper limb secondary lymphoedema same compression, same benefit?                                               |
| Tsai, H.J. (2009)              | Could Kinesio tape replace the bandage in decongestive lymphatic therapy for breast-cancer-related lymphedema? A pilot study                                         |
| Uzkeser, H. (2013)             | Intermittent pneumatic compression pump in upper extremity impairments of breast cancer-related lymphedema                                                           |
| Uzkeser, H. (2015)             | Efficacy of manual lymphatic drainage and intermittent pneumatic compression pump use in the treatment of lymphedema after mastectomy: a randomized controlled trial |
| <b>COMPARISON (2)</b>          |                                                                                                                                                                      |
| Da Costa G. (2010)             | Comparative study of a protocol of manual therapy applied in patients with cervical myofascial pain syndrome in two environments: water and ground                   |
| River W. (2008)                | Short-Term Hematologic and Hemodynamic Effects of Osteopathic Lymphatic Techniques: A Pilot Crossover Trial                                                          |
| <b>WRONG STUDY DESIGN (26)</b> |                                                                                                                                                                      |
| Alexander S. (2002)            | Osteopathic manipulative treatment for postoperative pain                                                                                                            |
| Almeida L.C. (2011)            | The effect of myofascial technique of Pompage in the ankle passive stiffness                                                                                         |

|                        |                                                                                                                                                  |
|------------------------|--------------------------------------------------------------------------------------------------------------------------------------------------|
| Antunes M.D. (2017)    | Análise comparativa dos efeitos da massoterapia e pompage cervical na dor e qualidade de vida em mulheres                                        |
| Bortolan A.S. (2009)   | Fisioterapia respiratoria: uso de técnicas de reequilíbrio toracoabdominal e pompage                                                             |
| Cramer D. (2010)       | Effect of Pedal Pump and Thoracic Pump Techniques on Intracranial Pressure                                                                       |
| Da Silva D.A.M. (2017) | Treatment of mechanical cervicalgy by traction and pompage techniques: a case report                                                             |
| Da Silva D.A.M.(2019)  | Efeito da pompage em pacientes com cefalea tensional                                                                                             |
| Dawood, R.S. (2013)    | Effectiveness of Kinesio Taping versus cervical traction on mechanical neck dysfunction                                                          |
| De Sousa, R. C. (2014) | The myofascial release and the treatment of tension headache induced by trigger points                                                           |
| Franzini D. (2018)     | Osteopathic Lymphatic Pump Techniques                                                                                                            |
| Hodge, L.M. (2011)     | Lymphatic pump treatment mobilizes leukocytes from the gut associated lymphoid tissue into lymph                                                 |
| Hodge, L.M. (2012)     | Osteopathic lymphatic pump techniques to enhance immunity and treat pneumonia                                                                    |
| Jarski R.W. (2000)     | The effectiveness of osteopathic manipulative tretment as complementary therapy following surgery: a prospective, match-controlled outcome study |
| Kilgore T. (2012)      | Adjuvant Lymphatic Osteopathic Manipulative Treatment in Patients With Lower-Extremity Ulcers: Effects on Wound Healing and Edema                |
| Klucka G.(2012)        | Effects of Abdominal Shape on Abdominal “Slosh” during Pedal Pump Osteopathic Manipulative Treatment                                             |
| Lima, I.S. (2011)      | Chest and neck mobilization effects on spirometric responses in healthy subjects                                                                 |
| Mazzone N. (2008)      | Temporomandibular joint disorders and maxillomandibular malformations: role of condylar “repositionin” plate                                     |
| Noll, D.R. (2008)      | Revisiting Castlio and Ferris-Swift's Experiments on Direct Splenic Stimulation in Patients With Acute Infectious Disease                        |
| Noll D.R. (2008)       | Clinical and Research Protocol for Osteopathic Manipulative Treatment of Elderly Patients With Pneumonia                                         |
| Noll, D.R. (2009)      | The immediate effect of individual manipulation techniques on pulmonary function measures in persons with chronic obstructive pulmonary disease  |
| Pandolfi (2017)        | Efeito agudo da liberação miofascial cervical e do alongamento da cadeia posterior sobre a mobilidade da coluna vertebral: estudo randomizado    |
| Patricio D. (2015)     | The Effect of the Osteopathic Thoracic Lymphatic Pump Technique on Salivary                                                                      |

|                                    |                                                                                                                                                                                                         |
|------------------------------------|---------------------------------------------------------------------------------------------------------------------------------------------------------------------------------------------------------|
|                                    | Secretory Immunoglobulin A Levels in Adults with Recurrent Upper Respiratory Tract Complaints                                                                                                           |
| Paesl (2014)                       | The effect of manual therapy on lumbar disc protrusion                                                                                                                                                  |
| Rudy A. (2018)                     | Osteopathic lymphatic pump treatment as an adjunctive therapy to protect against infection and inflammation                                                                                             |
| Schaverien, M.V. (2018)            | Nonoperative Treatment of Lymphedema                                                                                                                                                                    |
| Yao, S. (2014)                     | Osteopathic manipulative treatment as a useful adjunctive tool for pneumonia                                                                                                                            |
| <b>FULL TEXT NOT AVAILABLE (5)</b> |                                                                                                                                                                                                         |
| Dugan, E.P. (2001)                 | Effect of lymphatic pump techniques on the immune response to influenza vaccine                                                                                                                         |
| Measel, J.W. (1982)                | The effect of the lymphatic pump on the immune response: I. Preliminary studies on the antibody response to pneumococcal polysaccharide assayed by bacterial agglutination and passive hemagglutination |
| Mesina, J. (1998)                  | Transient Basophilia following the application of lymphatic pump techniques: a pilot study                                                                                                              |
| Paul, R.T. (1986)                  | Interferon levels in human subjects throughout a 24-hour period following thoracic lymphatic pump                                                                                                       |
| Sales T.O.P. (2013)                | Fisioterapia oncologica em pacientes mastectomizadas através de pompas e técnicas cinesioterápicas                                                                                                      |
